# Supplementary material for: Strong electron acceptor additive based spiro-OMeTAD for high-performance and hysteresis-less planar perovskite solar cells
Source: Royal Society of Chemistry journal article supplement (doi:10.1039/d0ra07254k), 2020-01-01
Supplement: d0ra07254k1.pdf [file d0ra07254k1.pdf]

# Supporting Information for

## Strong electron acceptor additive based spiro-OMeTAD for high- performance and hysteresis-less planar perovskite solar cells

Shibo Wang, Weihai Sun\*, Mingjing Zhang, Huiying Yan, Guoxin Hua, Zhao Li,  
Ruowei He, Weidong Zeng, Zhang Lan, and Jihuai Wu\*

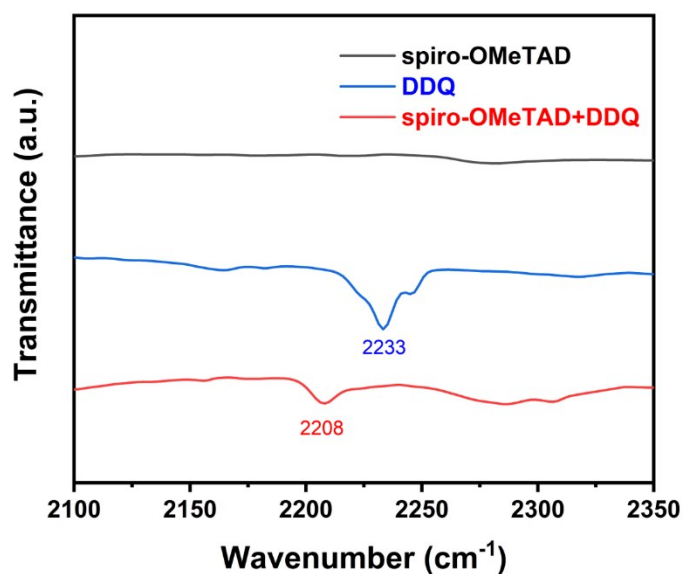

**Fig. S1** FTIR spectra of pristine spiro-OMeTAD, DDQ and DDQ-doped spiro-OMeTAD.

---

\* *Engineering Research Center of Environment-Friendly Functional Materials, Ministry of Education,*

*Fujian Engineering Research Center of Green Functional Materials,*

*Institute of Materials Physical Chemistry, Huaqiao University, Xiamen, 361021, China*

*E-mail: [sunweihai@hqu.edu.cn](mailto:sunweihai@hqu.edu.cn); [jhwu@hqu.edu.cn](mailto:jhwu@hqu.edu.cn) (J.H. Wu).*

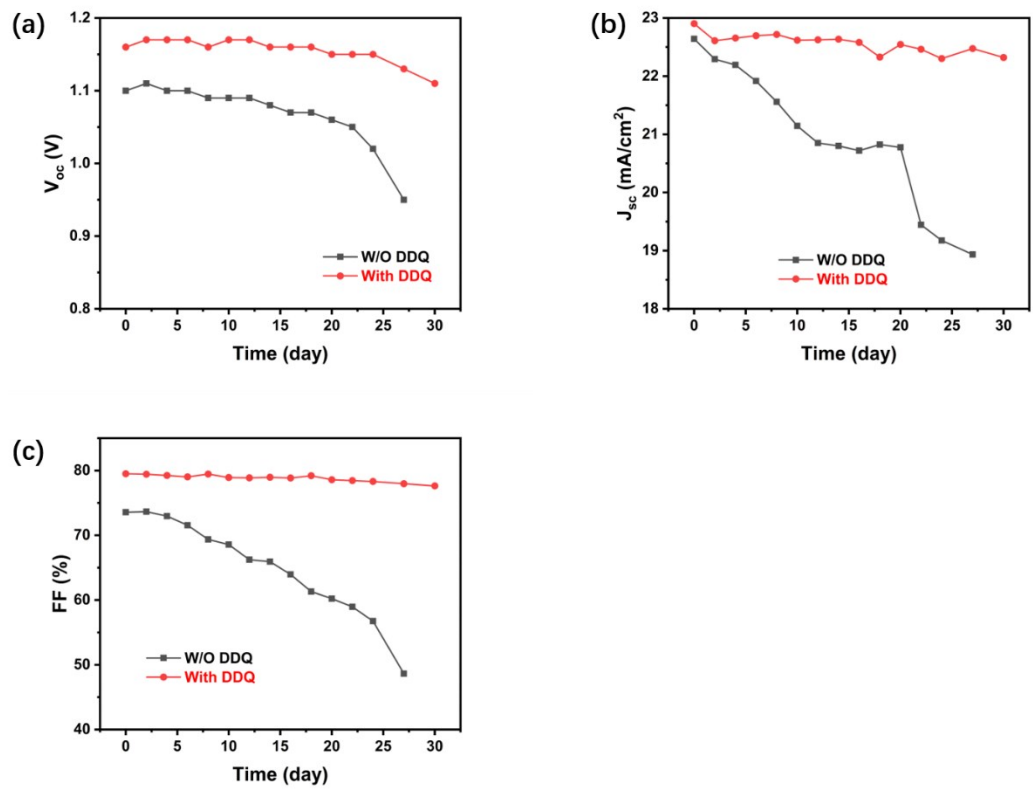

**Fig. S2** The evolutions of  $V_{oc}$  (a),  $J_{sc}$  (b) and FF (c) for the devices stored in the dark at room temperature with a relative humidity of about 20% .
